# Supplementary material for: Turnover of ribosome-associated transcripts from de novo ORFs produces gene-like characteristics available for de novo gene emergence in wild yeast populations
Source: HighWire-hosted journal article supplement (doi:10.1101/gr.239822.118), 2019-05-31

**SpA; tORF\_159125**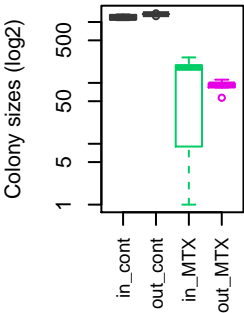**SpA; tORF\_148453**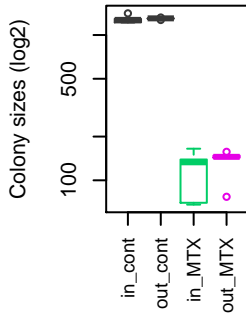**SpA; tORF\_216266**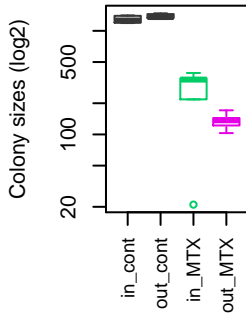**SpB; tORF\_216266**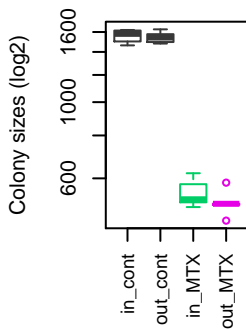**SpC; tORF\_14438**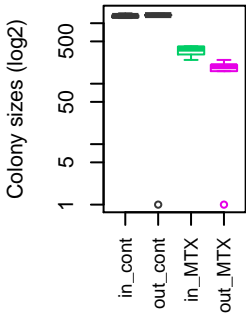**SpB; tORF\_92999**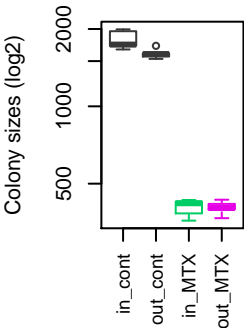**SpC; tORF\_92999**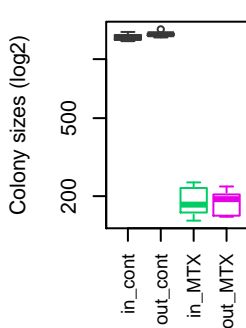**SpB; tORF\_111786**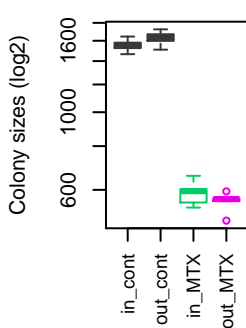**SpB; tORF\_228446**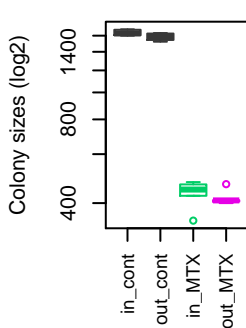**SpC; tORF\_163629**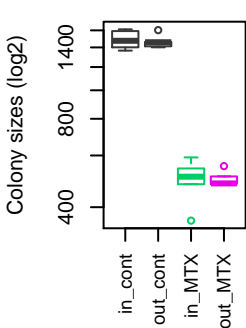**SpA; tORF\_173573**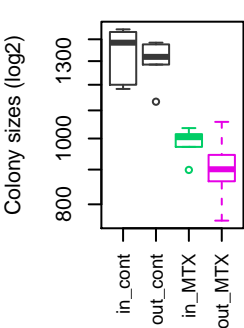**SpA; tORF\_7665**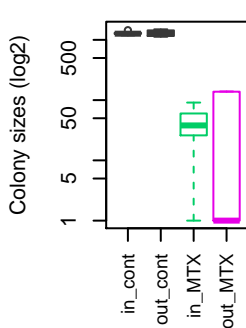**SpC; tORF\_7665**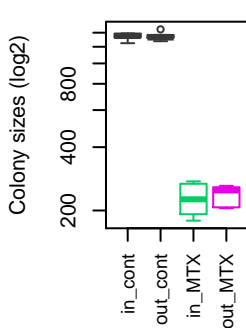**SpA; tORF\_203986**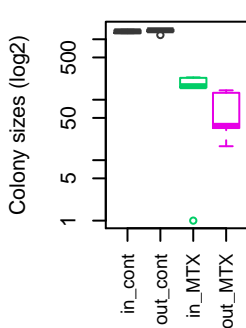**SpC; tORF\_135398**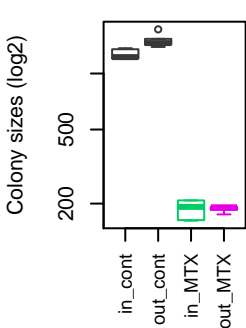

Supplement: Supplemental_Code.zip [file barplot_in_out_notsiglog.pdf › Supplemental_Code/07_candidates/figures/barplot_in_out_notsiglog.pdf]
