# Supplementary material for: Turnover of ribosome-associated transcripts from de novo ORFs produces gene-like characteristics available for de novo gene emergence in wild yeast populations
Source: HighWire-hosted journal article supplement (doi:10.1101/gr.239822.118), 2019-05-31

**SpA; tORF\_68573**

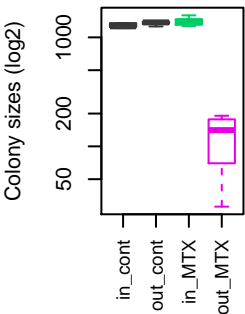

**SpC; tORF\_68573**

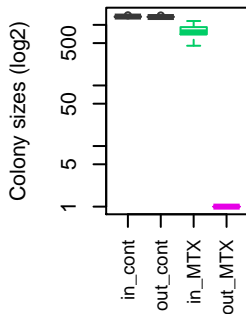

**SpA; tORF\_162702**

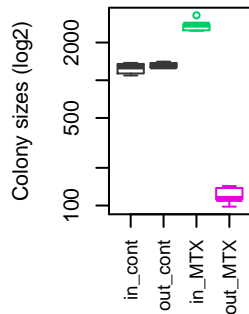

**SpB; tORF\_162702**

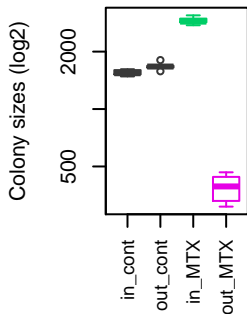

**SpC; tORF\_162702**

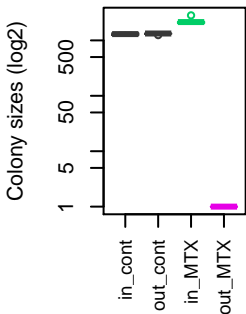

**SpB; tORF\_159125**

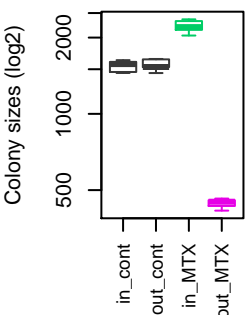

**SpC; tORF\_159125**

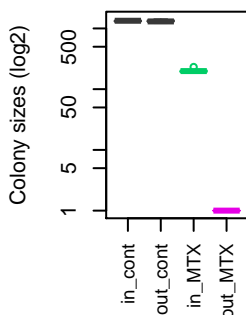

**SpA; tORF\_222017**

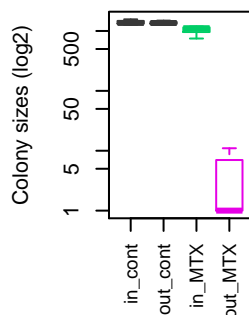

**SpB; tORF\_222017**

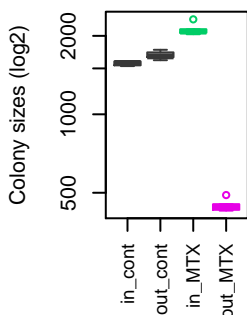

**SpC; tORF\_148453**

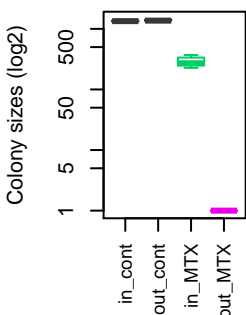

**SpC; tORF\_222327**

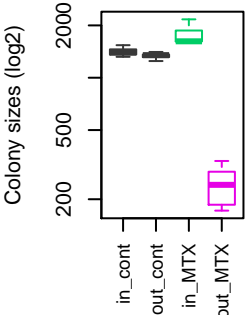

**SpC; tORF\_153429**

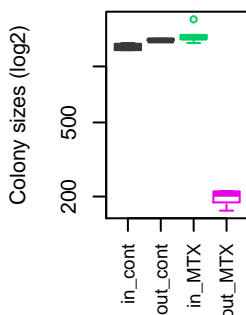

**SpA; tORF\_112033**

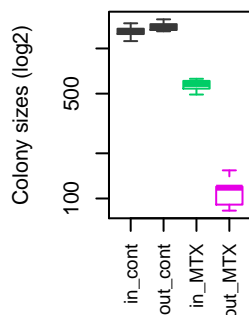

**SpB; tORF\_112033**

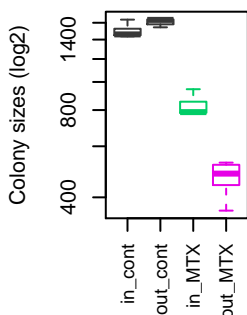

**SpB; tORF\_43211**

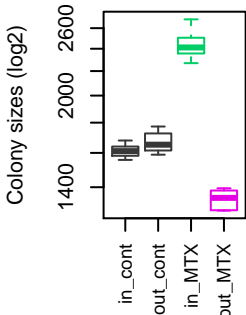

**SpC; tORF\_43211**

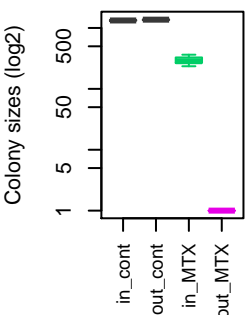

**SpC; tORF\_216266**

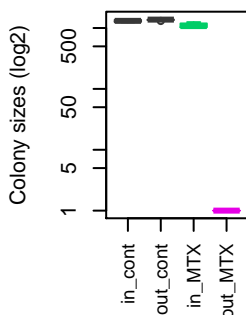

**SpB; tORF\_67223**

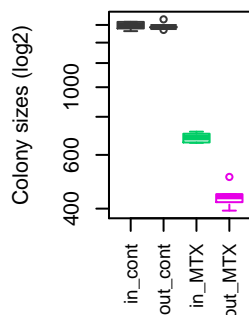

**SpC; tORF\_67223**

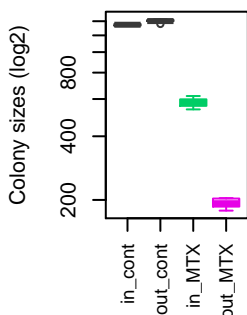

**SpA; tORF\_172828**

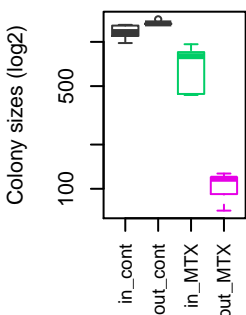

**SpA; tORF\_204361**

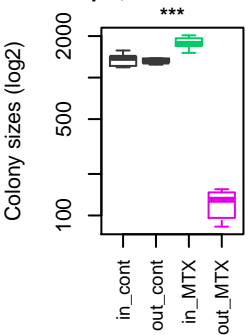

**SpC; tORF\_204361**

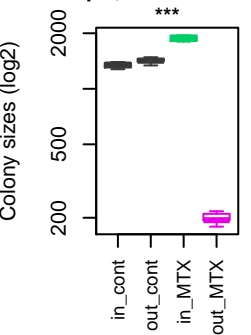

**SpA; tORF\_14438**

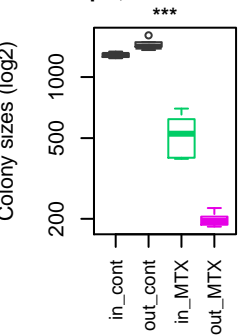

**SpB; tORF\_14438**

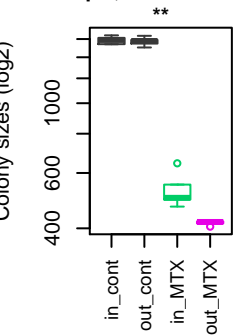

**SpA; tORF\_152062**

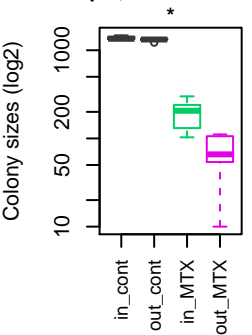

**SpC; tORF\_152062**

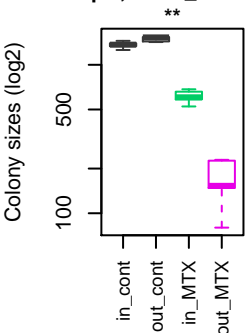

**SpC; tORF\_50484**

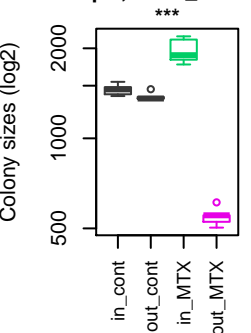

**SpC; tORF\_69174**

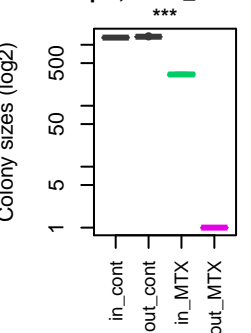

**SpA; tORF\_69270**

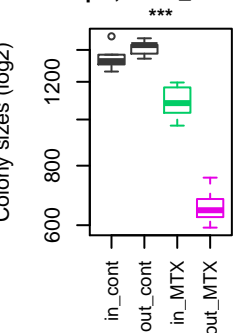

**SpA; tORF\_115556**

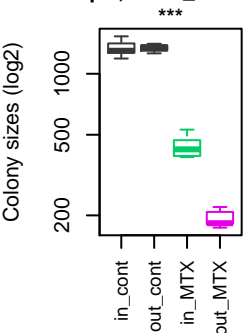

**SpC; tORF\_115556**

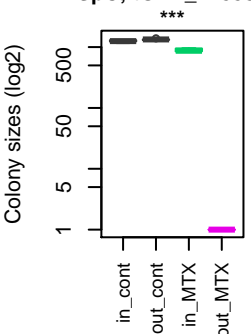

**SpC; tORF\_95911**

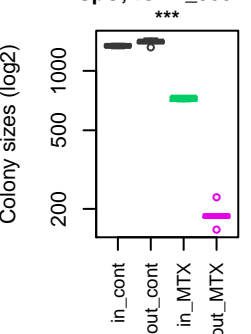

**SpB; tORF\_72149**

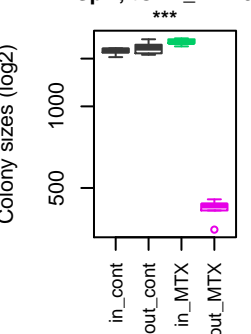

**SpC; tORF\_72149**

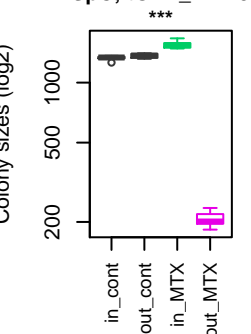

**SpA; tORF\_163629**

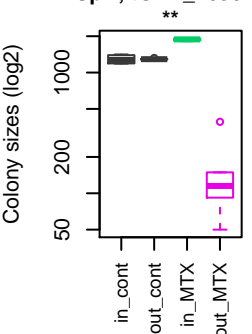

**SpB; tORF\_7665**

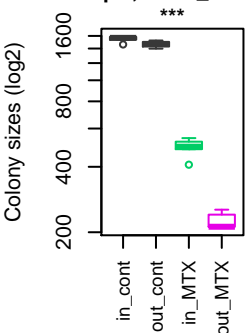

**SpC; tORF\_203986**

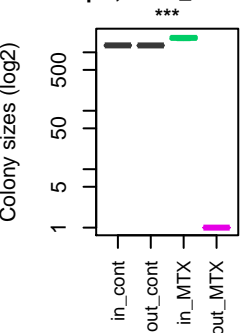

**SpA; tORF\_26242**

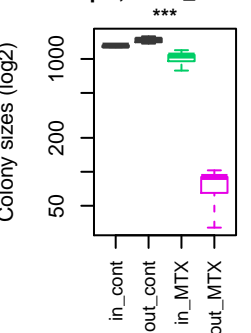

SpB; tORF\_26242

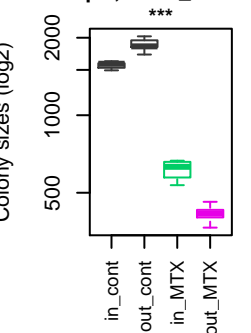

**SpA; tORF\_80547**

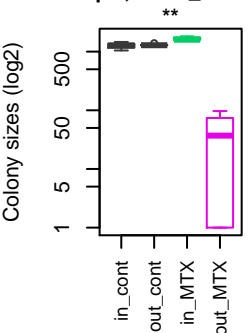

Supplement: Supplemental_Code.zip [file barplot_in_out_sig_log.pdf › Supplemental_Code/07_candidates/figures/barplot_in_out_sig_log.pdf]
