# Supplementary material for: Turnover of ribosome-associated transcripts from de novo ORFs produces gene-like characteristics available for de novo gene emergence in wild yeast populations
Source: HighWire-hosted journal article supplement (doi:10.1101/gr.239822.118), 2019-05-31
Supplement: Supplemental_Table_S3.pdf [file Supplemental_Table_S3.pdf]

**Supplemental Table S3. Detection of translated genes or iORFs.**

| Strain                                                        | Genes peak    | Genes phasing <sup>1</sup> | iORFs peak | iORFs phasing <sup>1</sup> |
|---------------------------------------------------------------|---------------|----------------------------|------------|----------------------------|
| YPS128 ( <i>S. cer</i> )                                      | 4,113 (86.1%) | 3,866 (94.0%)              | 101 (8.4%) | 37 (36.6%)                 |
| YPS744 ( <i>SpA</i> )                                         | 4,218 (88.3%) | 3,831 (90.8%)              | 736 (7.6%) | 194 (26.3%)                |
| MSH-604 ( <i>SpB</i> )                                        | 3,581 (75.0%) | 3,293(92.0%)               | 172 (1.8%) | 58 (33.7%)                 |
| MSH-587-1 ( <i>SpC</i> )                                      | 4,231 (88.6%) | 3,984 (94.0%)              | 554 (5.7%) | 199 (35.9%)                |
| Total (without<br>redundancy if<br>shared between<br>strains) | 4,590         | 4,445                      | 1,346      | 447                        |

<sup>1</sup> Number of iORFs or genes with a significant trinucleotide periodicity in ribosome profiling data among those with an initiation peak
