# Supplementary material for: Turnover of ribosome-associated transcripts from de novo ORFs produces gene-like characteristics available for de novo gene emergence in wild yeast populations
Source: HighWire-hosted journal article supplement (doi:10.1101/gr.239822.118), 2019-05-31
Supplement: Supplemental_Table_S5.xlsx [file Supplemental_Table_S5.xlsx]

## Sheet: Table_S5_DHFR_strains
Supplemental Table S5. List of DHFR constructions per strain1.
Type	Name	SpA in_frame	SpA out_frame	SpB in_frame	SpB out_frame	SpC in_frame	SpC out_frame
tORF	tORF_102655	0	1	1	1	1	1
tORF	tORF_111786	1	0	1	1	1	0
tORF	tORF_112033	1	1	1	1	1	0
tORF	tORF_115556	1	1	0	1	1	1
tORF	tORF_173573	1	1	0	0	1	0
tORF	tORF_210904	1	0	0	1	1	1
tORF	tORF_26242	1	1	1	1	1	0
tORF	tORF_7665	1	1	1	1	1	1
tORF	tORF_144879	0	1	0	1	0	0
tORF	tORF_159125	1	1	1	1	1	1
tORF	tORF_216266	1	1	1	1	1	1
tORF	tORF_228446	0	1	1	1	1	0
tORF	tORF_70680	1	0	1	1	1	1
tORF	tORF_135398	1	1	1	0	1	1
tORF	tORF_153359	1	1	1	1	1	1
tORF	tORF_153429	1	0	1	0	1	1
tORF	tORF_15907	1	1	1	1	0	1
tORF	tORF_162702	1	1	1	1	1	1
tORF	tORF_172828	1	1	0	0	1	0
tORF	tORF_192173	0	0	0	0	1	1
tORF	tORF_203986	1	1	0	0	1	1
tORF	tORF_212733	1	0	1	0	1	0
tORF	tORF_220388	1	1	1	1	1	1
tORF	tORF_222017	1	1	1	1	1	0
tORF	tORF_222327	1	0	1	0	1	1
tORF	tORF_230326	0	1	0	1	1	1
tORF	tORF_23483	0	1	1	1	0	1
tORF	tORF_36441	1	0	0	1	0	1
tORF	tORF_43211	0	1	1	1	1	1
tORF	tORF_67223	0	0	1	1	1	1
tORF	tORF_80547	1	1	0	1	0	1
tORF	tORF_80553	1	1	1	1	0	1
tORF	tORF_92999	0	1	1	1	1	1
tORF	tORF_148453	1	1	0	1	1	1
tORF	tORF_204361	1	1	0	1	1	1
tORF	tORF_72149	0	1	1	1	1	1
tORF	tORF_14438	1	1	1	1	1	1
tORF	tORF_152062	1	1	1	0	1	1
tORF	tORF_163629	1	1	0	1	1	1
tORF	tORF_50484	0	0	1	0	1	1
tORF	tORF_62412	1	1	0	0	0	0
tORF	tORF_68573	1	1	0	0	1	1
tORF	tORF_69174	0	1	0	0	1	1
tORF	tORF_69270	1	1	1	0	0	1
tORF	tORF_95911	1	0	1	0	1	1
Gene	YBR054W	0	0	0	0	1	1
Gene	YNL291C	0	0	0	0	0	1
Gene	YOR324C	0	0	0	0	0	1
Gene	YLR098C	0	0	0	0	1	1
Gene	YLR191W	0	0	0	0	1	1
Gene	YGL020C	0	0	0	0	0	1
Gene	YHR046C	0	0	0	0	1	1
Gene	YOR368W	0	0	0	0	0	1
Gene	YNL127W	0	0	0	0	1	1
Gene	YGL017W	0	0	0	0	1	1
Gene	YAR042W	0	0	0	0	0	0
Gene	YLR039C	0	0	0	0	1	1
1 DHFR transformation experiments were conducted on YPS744 (SpA), MSH604 (SpB) and MSH587 (SpC) strains. Successful transformations are indicated by a “1” whereas missing DHFR strains are indicated by a “0”.
