# Supplementary figures and images for: Turnover of ribosome-associated transcripts from de novo ORFs produces gene-like characteristics available for de novo gene emergence in wild yeast populations
Source: HighWire-hosted journal article supplement (doi:10.1101/gr.239822.118), 2019-05-31

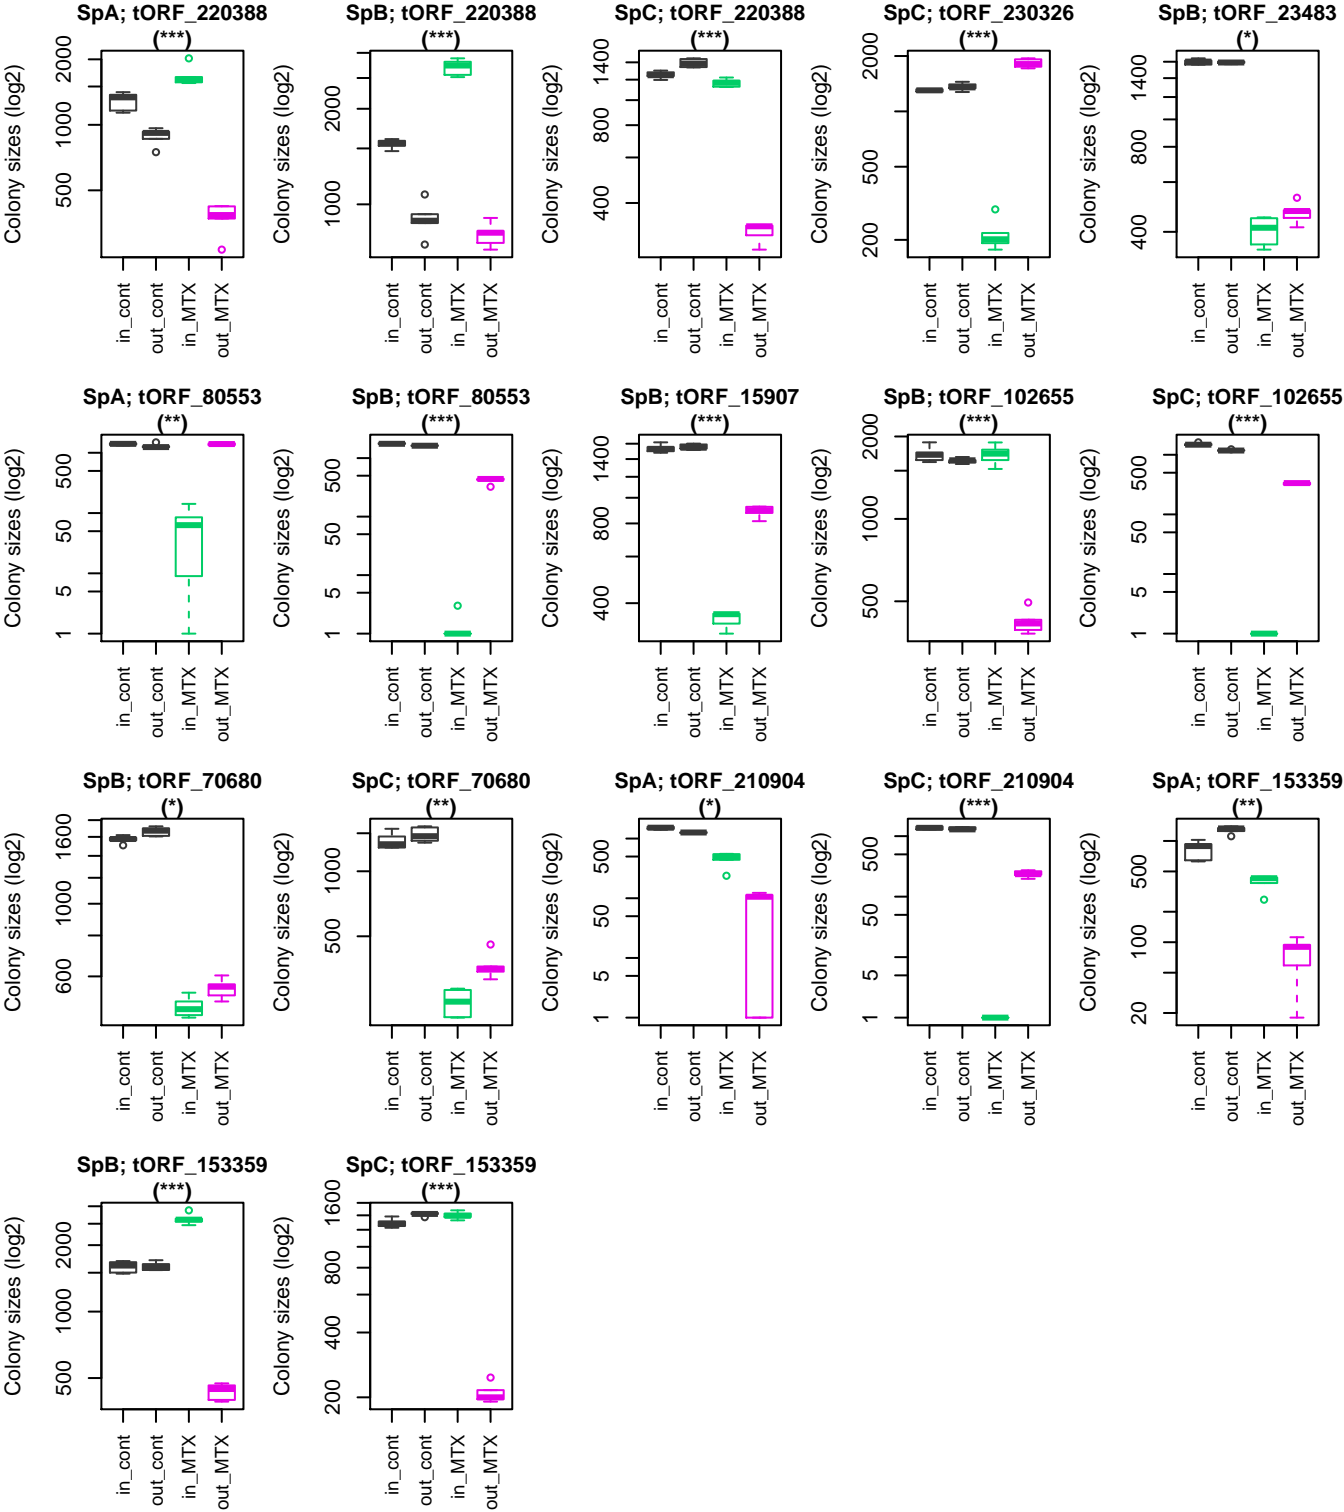

Supplement: Supplemental_Code.zip [file barplot_in_out_weird.pdf › Supplemental_Code/07_candidates/figures/barplot_in_out_weird.pdf]
